# Supplementary material
Source: publisher figshare collection journal article supplement (https://acs.figshare.com/ndownloader/files/4657768)
Supplement: Supplementary file 1 [file 4657768]

# **Aplaminal: A Novel Cytotoxic Amino Acid Isolated from the Sea Hare *Aplysia kurodai***

Takeshi Kuroda and Hideo Kigoshi\*

*Department of Chemistry, University of Tsukuba, 1-1-1 Tennoudai, Tsukuba, Ibaraki 305-8571, Japan*

## **List of Supporting Information**

### **Experimental Procedures**

**<sup>1</sup>H NMR Data for aplaminal (1; 270 MHz, acetone-*d*<sub>6</sub>)**

**Chart 1.** <sup>1</sup>H NMR Spectrum of aplaminal (1; 270 MHz, CD<sub>3</sub>OD)

**Chart 2.** <sup>1</sup>H NMR Spectrum of aplaminal (1; 270 MHz, acetone-*d*<sub>6</sub>)

**Chart 3.** <sup>13</sup>C NMR Spectrum of aplaminal (1; 151 MHz, CD<sub>3</sub>OD)

**Chart 4.** <sup>1</sup>H-<sup>1</sup>H COSY Spectrum of aplaminal (1; 270 MHz, CD<sub>3</sub>OD)

**Chart 5.** HMQC Spectrum of aplaminal (1; 600 MHz, CD<sub>3</sub>OD)

**Chart 6.** HMBC Spectrum of aplaminal (1; 600 MHz, CD<sub>3</sub>OD)

## Experimental Procedures

**Material.** The sea hare *Aplysia kurodai* was collected at the reef of Azurihama, Mie, Japan.

**Extraction and isolation.** Approximately 18 kg (wet weight) of sea hare was extracted with methanol (36 L) for 1 week. The extract was filtered, and the filtrate was concentrated. The residue was partitioned between ethyl acetate ( $3 \times 1$  L) and water (1 L). The ethyl acetate layer was washed with water (500 mL) and concentrated. The residue (21.9 g) was partitioned between 90% methanol (1 L) and hexane ( $2 \times 1$  L). The 90% methanol layer was concentrated and partitioned between 60% methanol (1 L) and dichloromethane ( $2 \times 1$  L). The dichloromethane layer was concentrated. The residue (11.8 g) was loaded on a silica gel column (200 g) and eluted with benzene-ethyl acetate = 1:1  $\rightarrow$  ethyl acetate  $\rightarrow$  ethyl acetate-methanol = 4:1  $\rightarrow$  1:1  $\rightarrow$  methanol (1.2 L each). The concentrated fraction (0.7 g) eluted with ethyl acetate-methanol = 1:1 was loaded on an aluminum oxide column (0.7 g) and eluted with ethyl acetate  $\rightarrow$  ethyl acetate-methanol = 19:1  $\rightarrow$  9:1. The concentrated fraction (9.7 mg) eluted with ethyl acetate – methanol = 19:1 was chromatographed by reversed-phase HPLC [1. Develosil ODS-HG-5,  $\phi$  20  $\times$  250 mm, acetonitrile-0.02 M ammonium acetate = 65:35, 5 mL/min,  $t_R$  = 5 min; 2. Develosil ODS-HG-5,  $\phi$  20  $\times$  250 mm, methanol-water = 50:50, 5 mL/min,  $t_R$  = 21 min] to give **1** (2.0 mg, 0.00001% based on wet wt).

**$^1\text{H}$  NMR Data for aplaminal (**1**; 270 MHz, acetone- $d_6$ )**  $\delta$  7.76 (d,  $J$  = 9.1 Hz, 2H), 6.85 (d,  $J$  = 9.1 Hz, 2H), 6.62 (br s, 1H), 4.26 (ddd,  $J$  = 1.4, 5.7, 9.2 Hz, 1H), 3.85-3.75 (m, 1H), 3.79 (s, 3H), 3.78 (s, 3H), 3.66 (m, 1H), 3.36 (d,  $J$  = 9.2 Hz, 1H), 3.23 (m, 1H), 2.46 (s, 3H).

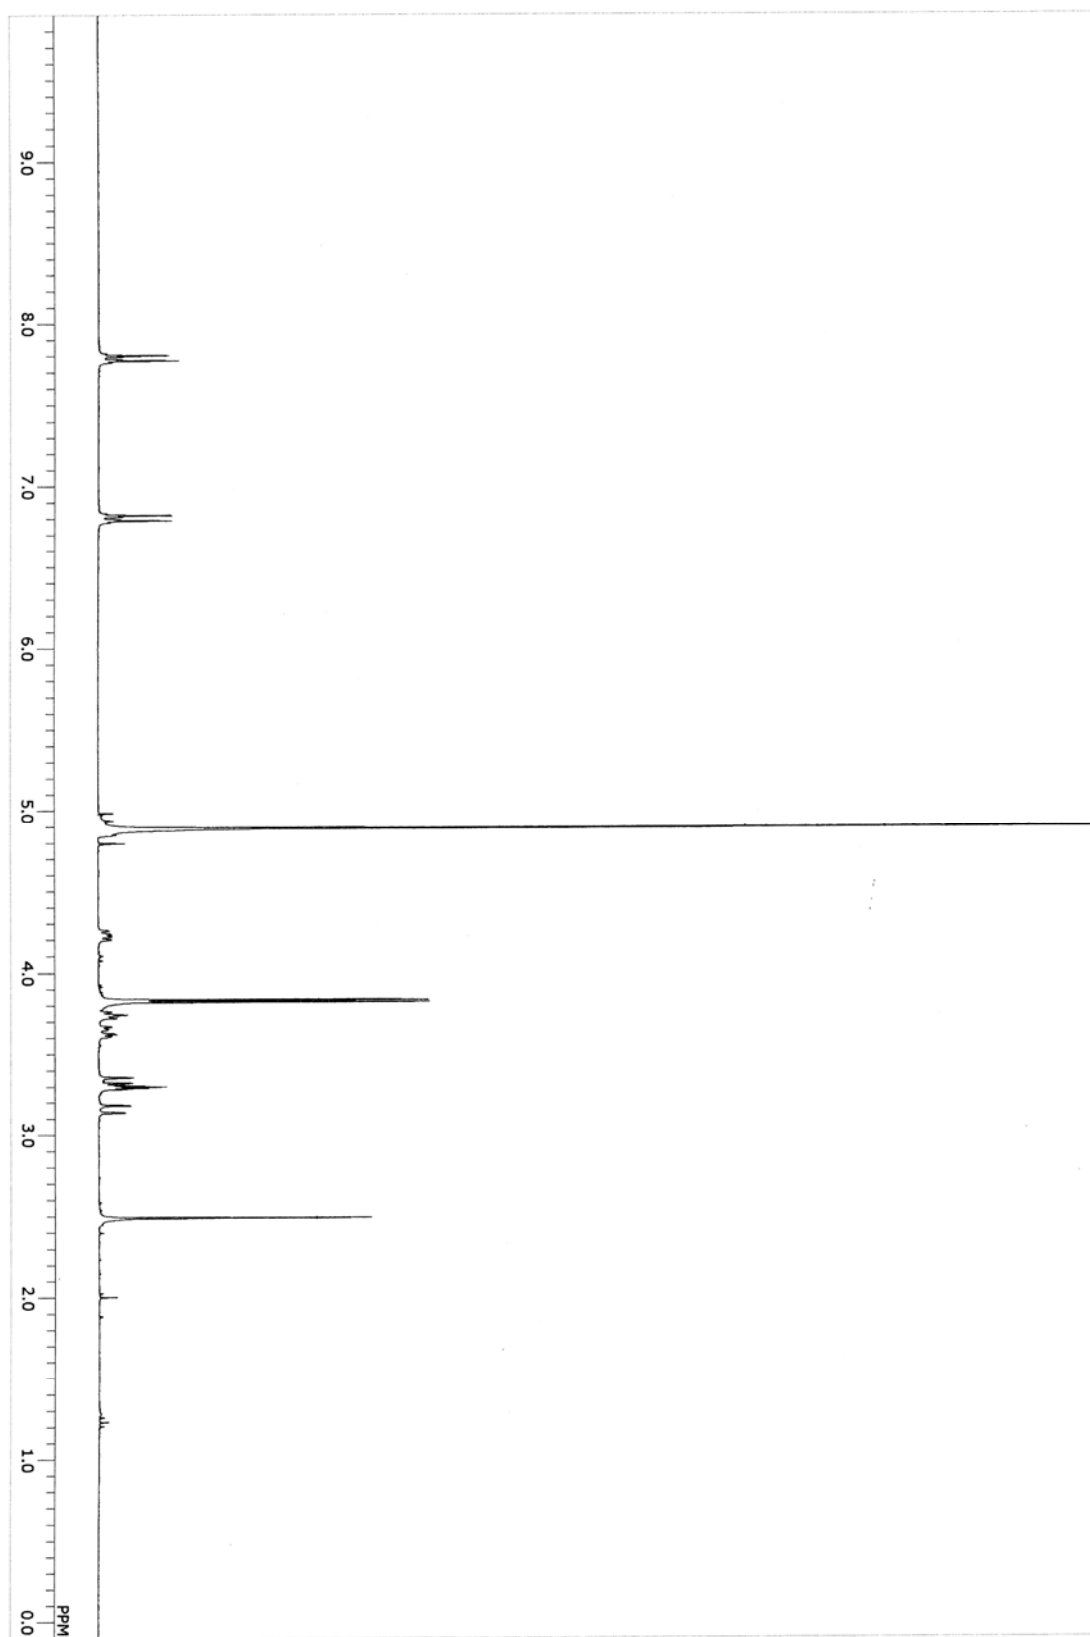

**Chart 1.**  $^1\text{H}$  NMR spectrum of **1** [270 MHz,  $\text{CD}_3\text{OD}$ ].

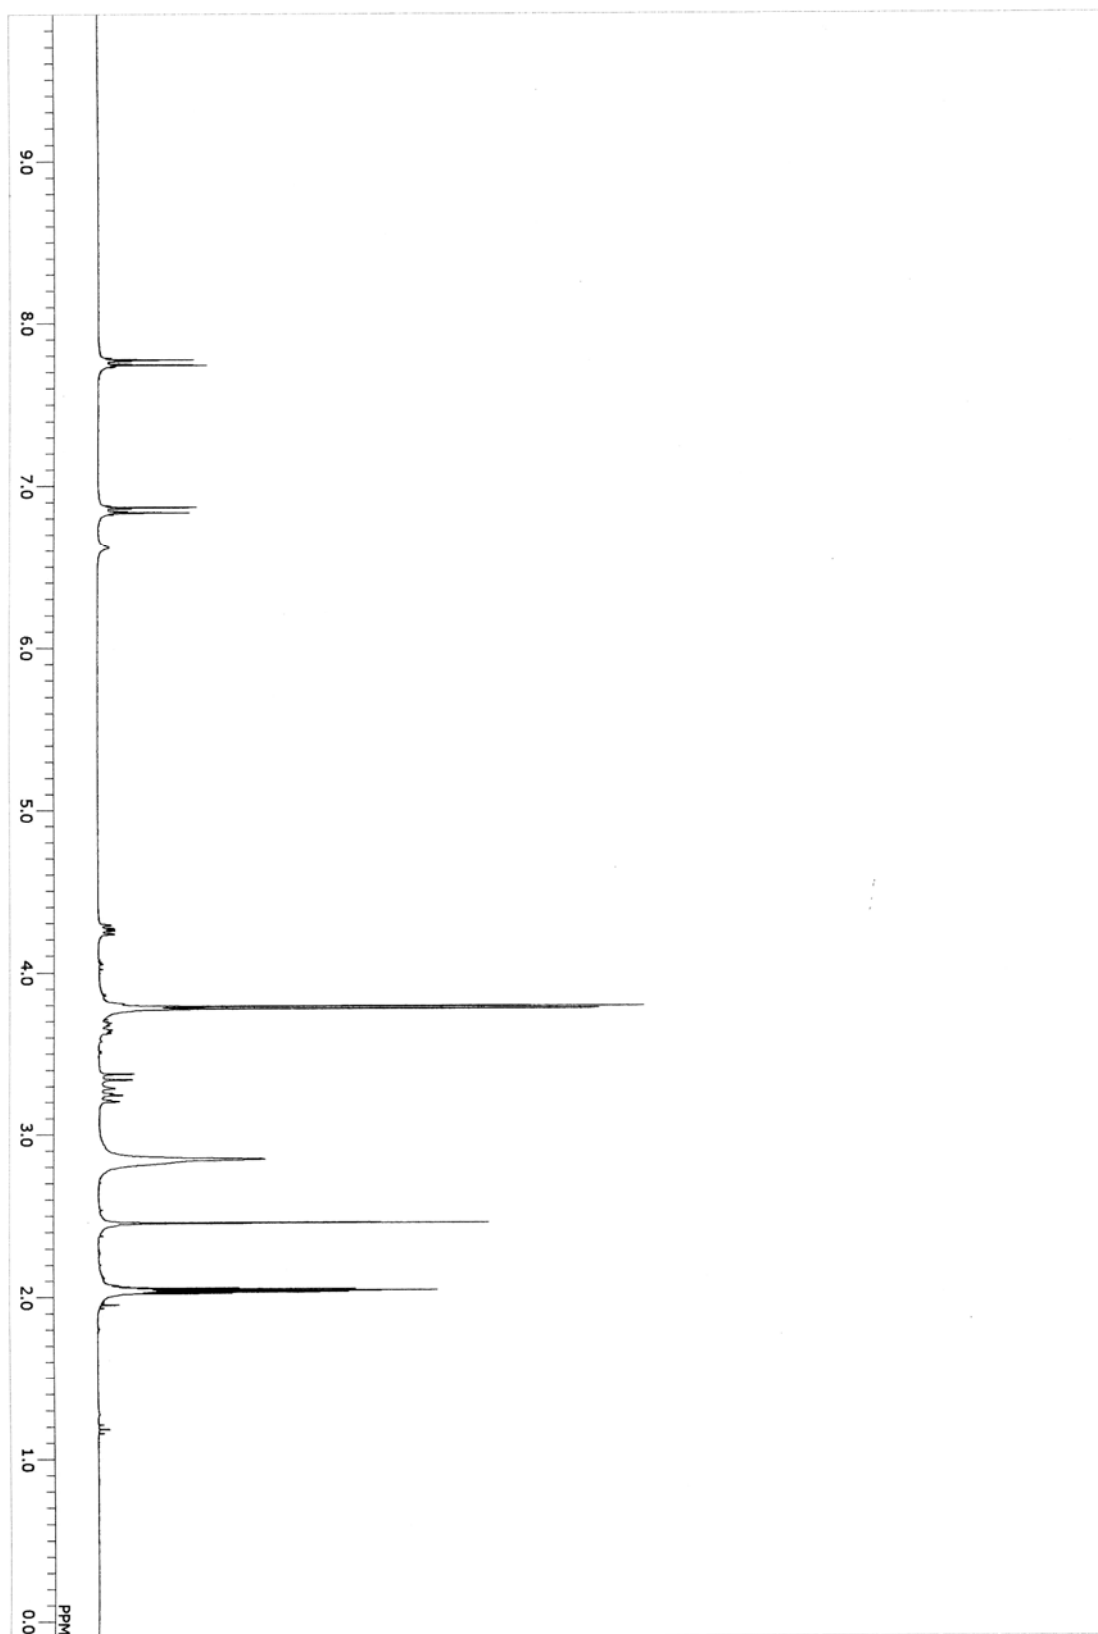

**Chart 2.**  $^1\text{H}$  NMR spectrum of **1** [270 MHz,  $\text{acetone-}d_6$ ].

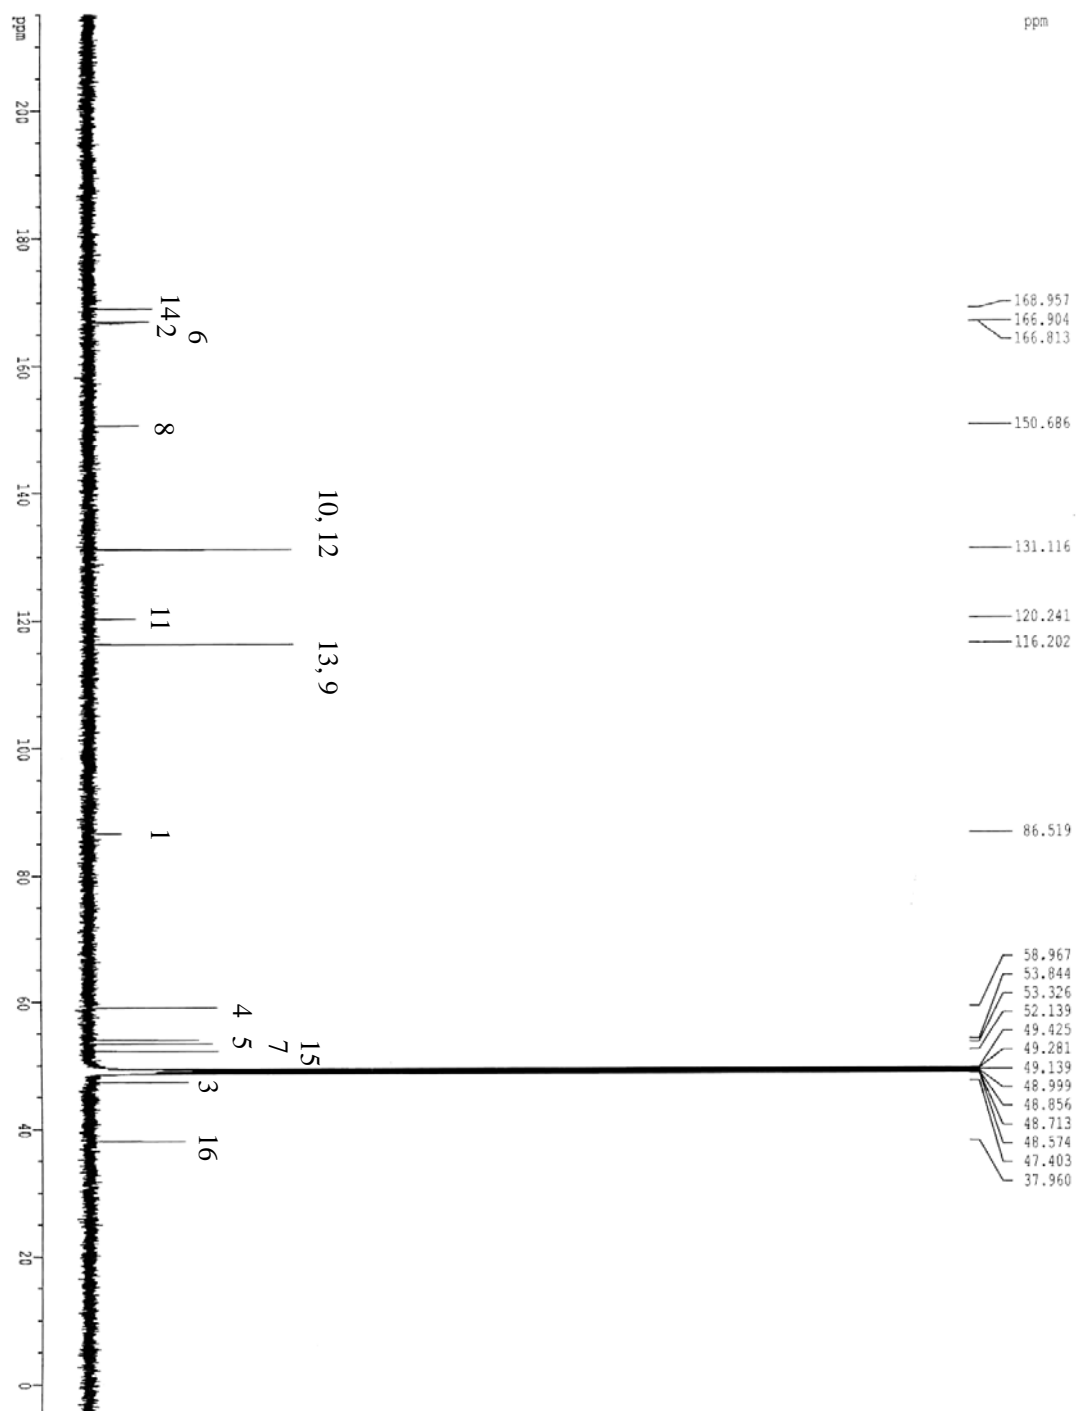

**Chart 3.** <sup>13</sup>C NMR spectrum of **1** [151 MHz, CD<sub>3</sub>OD].

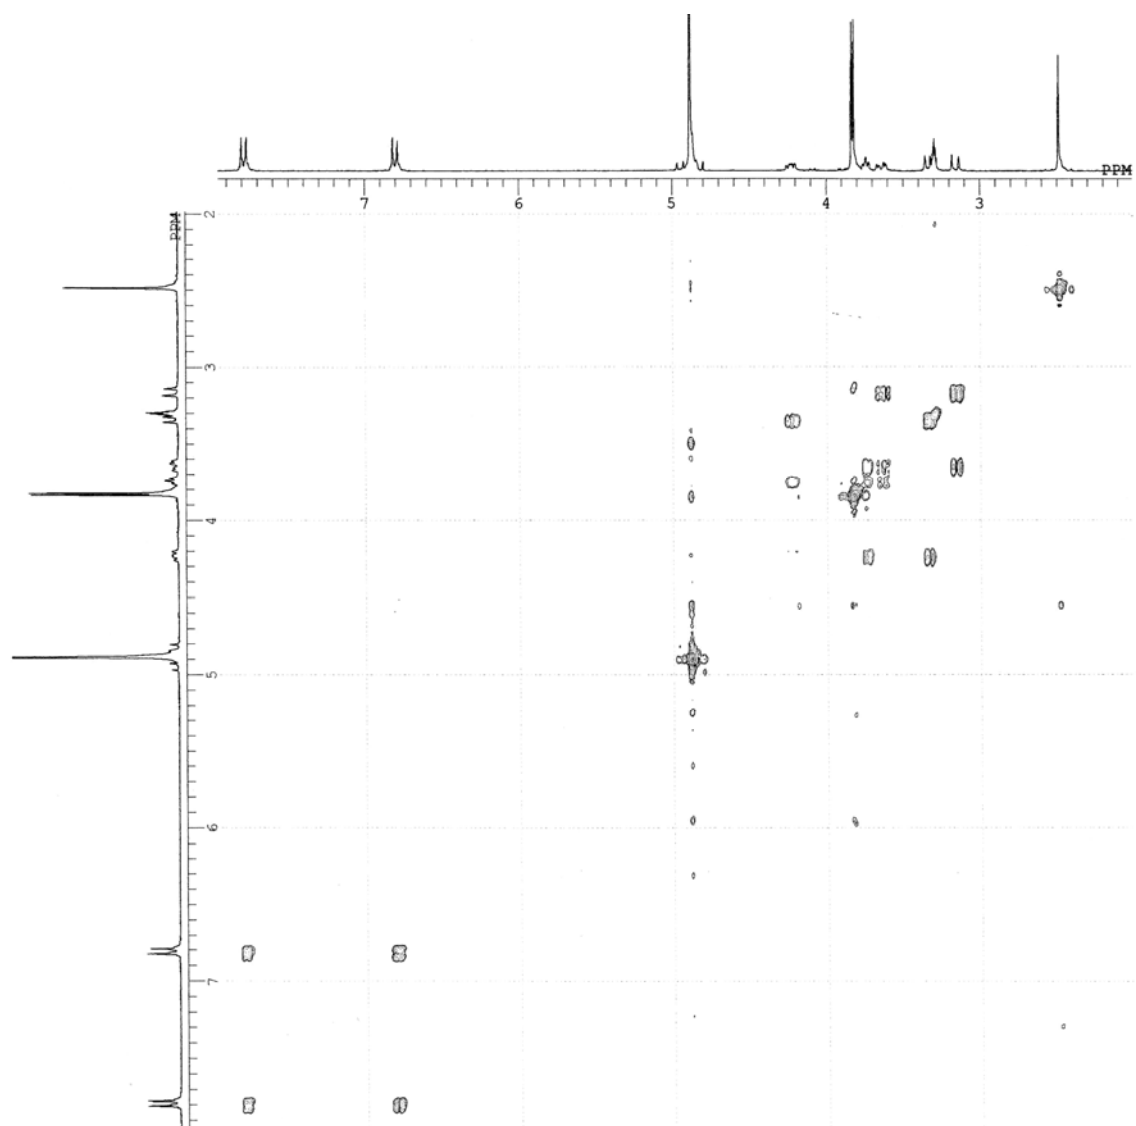

**Chart 4.**  $^1\text{H}$ - $^1\text{H}$  COSY spectrum of **1** [270 MHz,  $\text{CD}_3\text{OD}$ ].

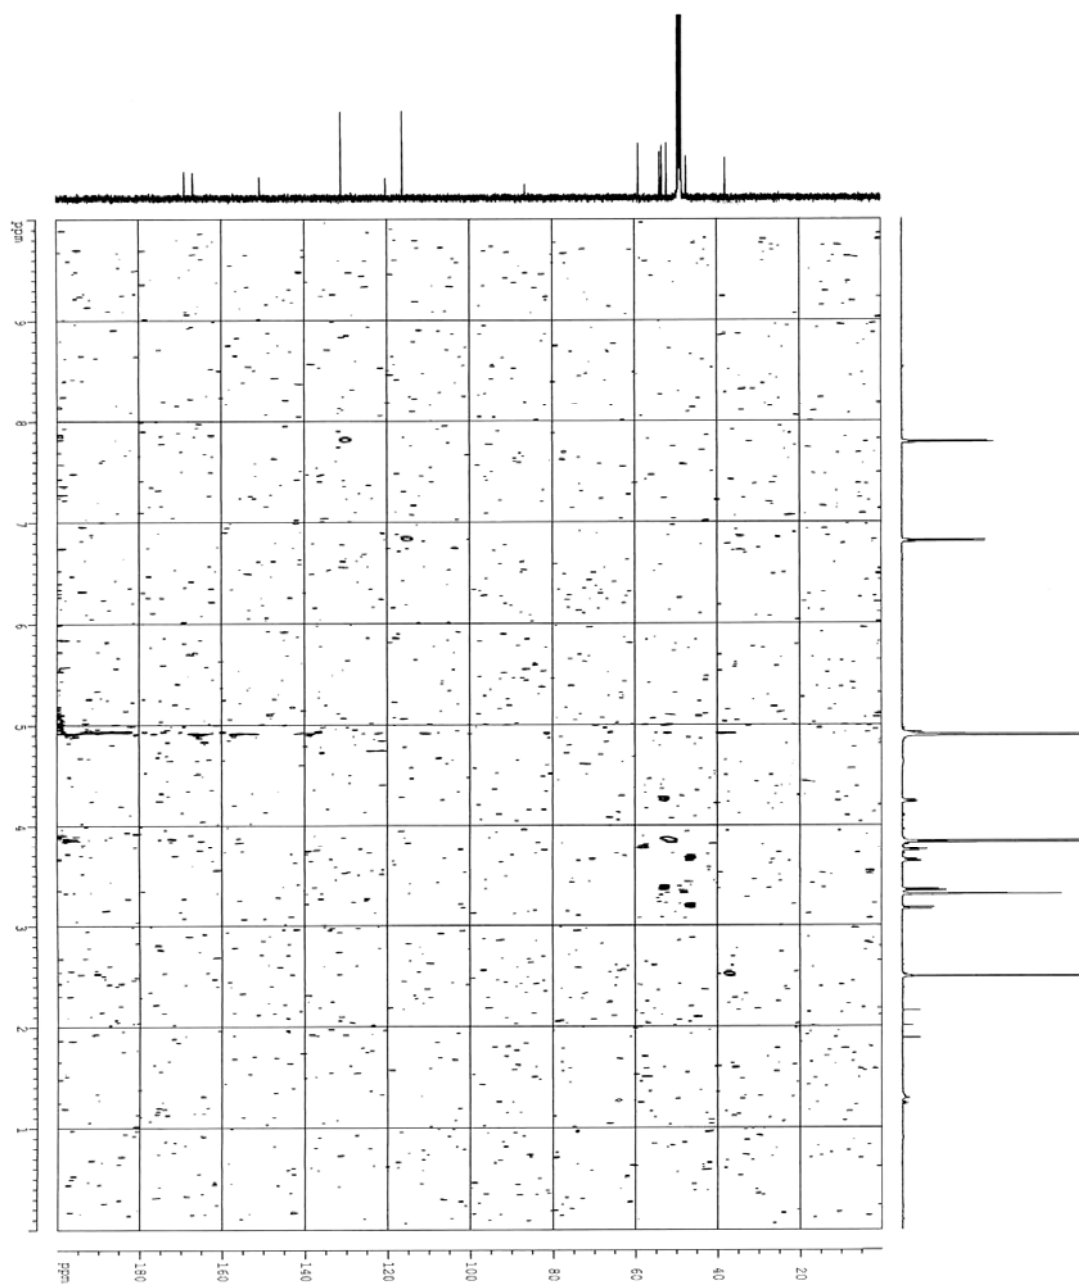

**Chart 5.** HMQC spectrum of **1** [600 MHz, CD<sub>3</sub>OD].

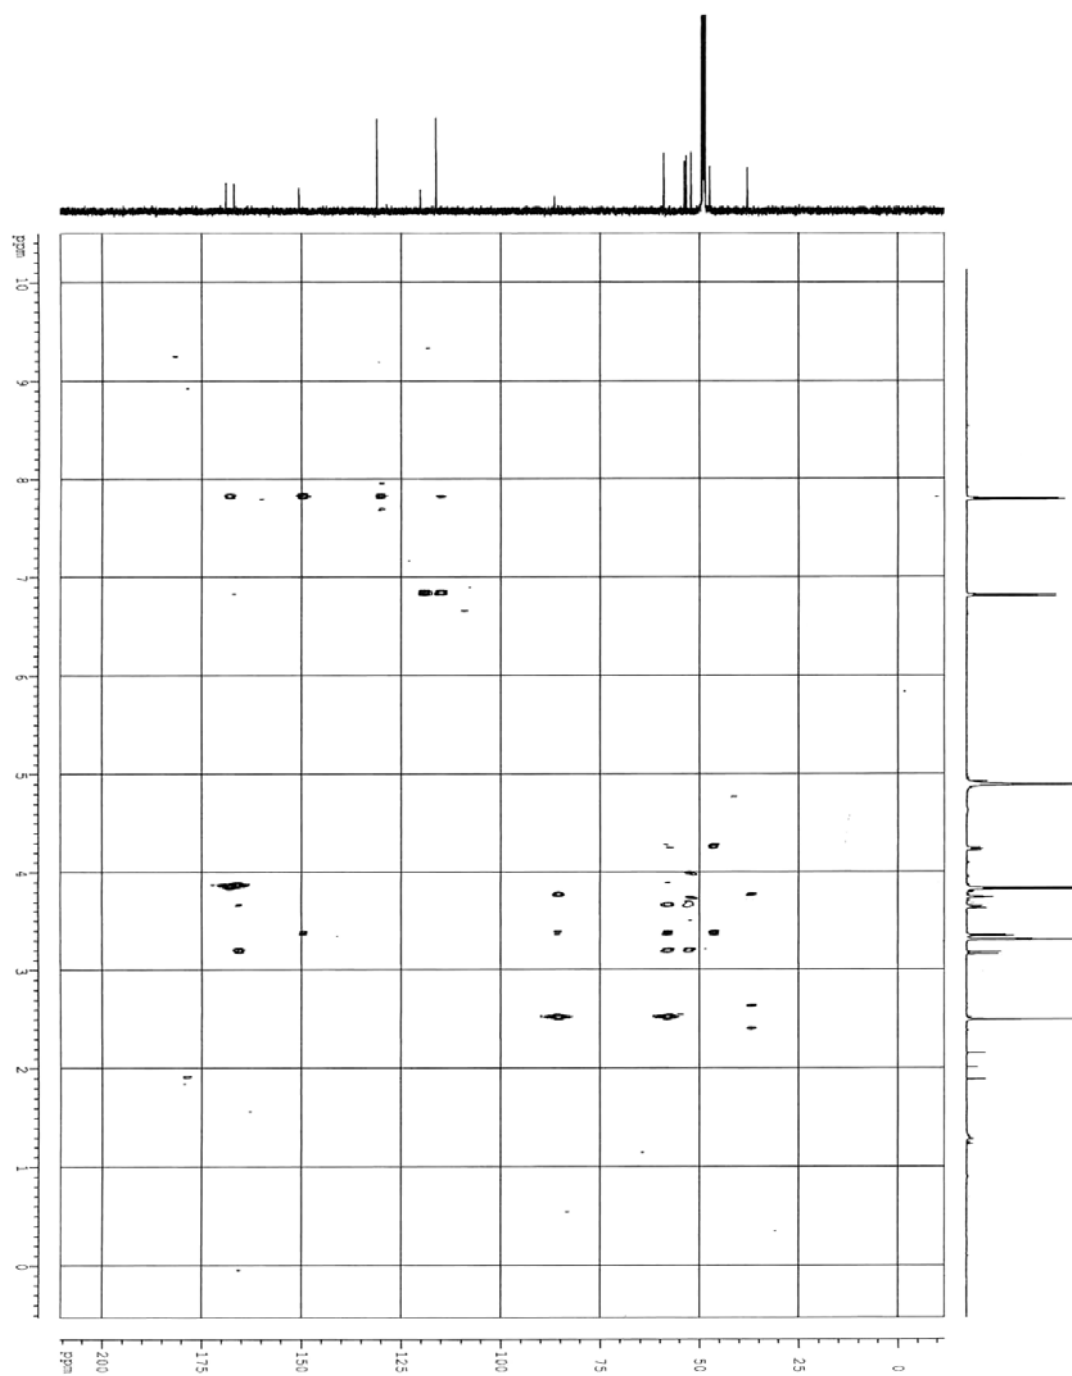

**Chart 6.** HMBC spectrum of **1** [600 MHz, CD<sub>3</sub>OD].
